# Supplementary material
Source: PubMed Central journal article supplement (PMC3169209)
Supplement: 97320630007001S1.pdf [file 97320630007001S1.pdf]

## Supplementary material:

**Table 1:** XP Docking of available drug molecules with PknG of *M. tuberculosis*

| S. No | Compounds            | Glide Score | Glide Energy | H Bond Interaction | Bond Distance(DH...A)<br>Å |
|-------|----------------------|-------------|--------------|--------------------|----------------------------|
| 1     | Ciprofloxacin        | -4.40       | -31.959      | (NH...O)A:GLU 233  | 2.853                      |
| 2     | Kanamycin            | -6.91       | -48.195      | (OH...O)A:SER 239  | 3.252                      |
|       |                      |             |              | (NH...O)A:VAL 235  | 3.125                      |
| 3     | Isoniazid            | -6.63       | -28.956      | (NH...O)A:ILE 292  | 2.459                      |
|       |                      |             |              | (NH...O)A:VAL 235  | 2.965                      |
| 4     | Ethionamide          | -5.31       | -26.184      | (NH...O)A:GLU 233  | 2.698                      |
| 5     | Prothionamide        | -5.82       | -29.590      | (NH...O)A:GLU 233  | 3.124                      |
| 6     | Pyrazinamide         | -4.54       | -27.236      | (NH...O)A:GLU 233  | 2.568                      |
|       |                      |             |              | (NH...O)A:VAL 235  | 2.867                      |
| 7     | Amino salicylic acid | -5.19       | -24.377      | (NH...O)A:GLU 233  | 3.214                      |
|       |                      |             |              | (NH...O)A:VAL 235  | 3.312                      |
| 8     | Cycloserine          | -4.34       | -21.498      | (NH...O)A:VAL 235  | 2.134                      |
| 9     | Streptomycin         | -4.94       | -44.669      | A:LYS 241 (NH...O) | 2.142                      |
| 10    | Ethambutol           | -4.40       | -31.959      | (OH...O)A:GLY 237  | 3.217                      |
|       |                      |             |              | (NH...O)A:VAL 235  | 3.152                      |

**Table 2:** XP Docking of bioactive compounds from *W somnifera* with PknG of *M. tuberculosis*

| S. No | Compounds                                   | Glide Score  | Glide Energy   | H Bond Interaction        | Bond Distance (DH...A) Å |
|-------|---------------------------------------------|--------------|----------------|---------------------------|--------------------------|
|       | AX20017                                     | -5.63        | -40.423        | A:VAL 235 (NH...O)        | 3.381                    |
| 1     | <b>Withanolide D</b>                        | <b>-7.63</b> | <b>-42.901</b> | (NH...O) A:GLU 233        | 3.327                    |
|       |                                             |              |                | <b>A:GLN 238 (NH...O)</b> | <b>2.779</b>             |
|       |                                             |              |                | <b>A:VAL 235 (NH...O)</b> | <b>3.068</b>             |
|       |                                             |              |                | <b>A:SER 239 (OH...O)</b> | <b>3.109</b>             |
| 2     | Withanolide A                               | -4.51        | -40.724        | A:GLN 238 (NH...O)        | 3.005                    |
| 3     | <b>Withanolide E</b>                        | <b>-7.86</b> | <b>-48.905</b> | <b>A:VAL 235 (NH...O)</b> | <b>3.094</b>             |
|       |                                             |              |                | <b>(OH...O) A:GLY 237</b> | <b>2.739</b>             |
| 4     | <b>Withanolide F</b>                        | <b>-7.69</b> | <b>-47.077</b> | <b>A:SER 293 (NH...O)</b> | <b>3.375</b>             |
|       |                                             |              |                | <b>A:VAL 235 (NH...O)</b> | <b>2.739</b>             |
| 5     | 4β-Hydroxywithanolide E                     | -6.46        | -48.767        | A:HIS 159 (NH...O)        | 2.980                    |
|       |                                             |              |                | (OH...O) A:GLY 237        | 2.828                    |
| 6     | Withaferin A                                | -6.84        | -36.108        | (OH...O) A:ILE 292        | 2.849                    |
|       |                                             |              |                | A:VAL 235 (NH...O)        | 2.935                    |
| 7     | Diacetate 2-phenylcarbonate<br>withaferin A | -4.75        | -41.948        | -                         | -                        |
| 8     | 2,3 dihydro withaferin A                    | -4.58        | -34.799        | A:SER 239 (OH...O)        | 2.856                    |
|       |                                             |              |                | (OH...O) A:HIS 159        | 2.769                    |
|       |                                             |              |                | A:LYS 241 (NH...O)        | 2.985                    |
| 9     | 2,7 deoxy 2,3 dihydro withaferin A          | -4.58        | -34.799        | A:SER 239 (OH...O)        | 2.856                    |
|       |                                             |              |                | (OH...H) A:HIS 159        | 2.769                    |
|       |                                             |              |                | A:LYS 241 (NH...O)        | 2.985                    |
| 10    | Deoxytetrahydroacetate withaferin A         | -5.73        | -41.078        | A:GLN 238 (NH...O)        | 2.923                    |
|       |                                             |              |                | (OH...O) A:GLY 237        | 2.979                    |

**Table 3:** ADME results for the Withanolide compounds

| S. No | Compounds     | Molecular Weight<br>(130.0 to 725.0) | Donor HB<br>(0.0 to 6.0) | Accept HB<br>(2.0 to 20.0) | QP LOG O/W<br>(-2 to 6.5) | % Human Oral Absorption (>80% is high & <25% is poor) | Rule of Five |
|-------|---------------|--------------------------------------|--------------------------|----------------------------|---------------------------|-------------------------------------------------------|--------------|
|       | Ligand        | 268.37                               | 2.000                    | 4.500                      | 0.946                     | 77.723                                                | 0            |
| 1     | Withanolide D | 454.61                               | 1.000                    | 8.700                      | 3.481                     | 100.00                                                | 0            |
| 2     | Withanolide A | 470.61                               | 2.000                    | 9.450                      | 3.067                     | 91.634                                                | 0            |
| 3     | Withanolide E | 486.60                               | 3.000                    | 9.250                      | 3.153                     | 95.431                                                | 0            |
| 4     | Withanolide F | 488.62                               | 4.000                    | 8.950                      | 2.784                     | 81.153                                                | 0            |
| 5     | Withaferin    | 500.67                               | 0.000                    | 9.000                      | 3.936                     | 88.150                                                | 1            |
